# Supplementary material for: Biogenic amorphous silica as main driver for plant available water in soils
Source: PubMed Central journal article supplement (PMC7016105; doi:10.1038/s41598-020-59437-x), 2020-02-12
Supplement: 41598_2020_59437_MOESM1_ESM.pdf [file 41598_2020_59437_MOESM1_ESM.pdf]

1 **Supplementary Information to:**

2 **Biogenic amorphous silica as main driver for plant available water in**  
3 **soils**

4  
5 **Authors**

6 *Jörg Schaller<sup>1\*</sup>, Andreas Cramer<sup>1,2</sup>, Andrea Carminati<sup>2</sup>, and Mohsen Zarebanadkouki<sup>2</sup>*

7  
8 **Affiliations**

9 <sup>1</sup> Environmental Geochemistry, Bayreuth Center for Ecology and Environmental Research  
10 (BayCEER), University Bayreuth, Universitätsstraße 30, 95447 Bayreuth, Germany

11 <sup>2</sup> Chair of Soil Physics, University Bayreuth, Universitätsstraße 30, 95447 Bayreuth, Germany

12  
13  
14 ***Supplementary Figures***

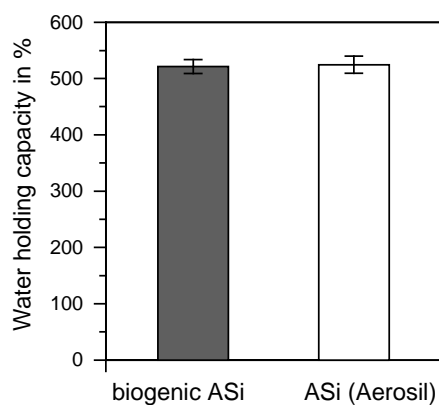

15

16 **Fig. S1. High water holding capacity of biogenic amorphous silica and its artificial**  
17 **analog.** Water holding capacity after centrifuge at 5,000 ×g of biogenic ASi derived  
18 from rice straw and of the artificial analog (the amorphous silica Aerosil).

19

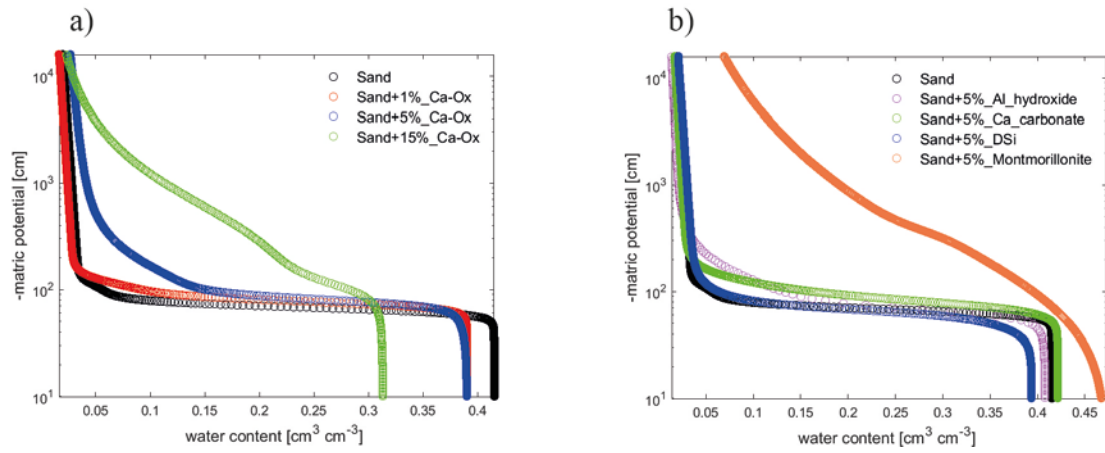

20

21 **Fig. S2. Water holding capacity of sand with different amendments.** Soil water potential  
 22 as function of volumetric water content of soil mixed with different contents of calcium  
 23 oxalate (a) and of sand mixed with 5% of aluminum hydroxides (Al\_hydroxide),  
 24 calcium carbonate (Ca\_carbonate), dissolved silica (DSi), or montmorillonite, each (b).

25

26

27

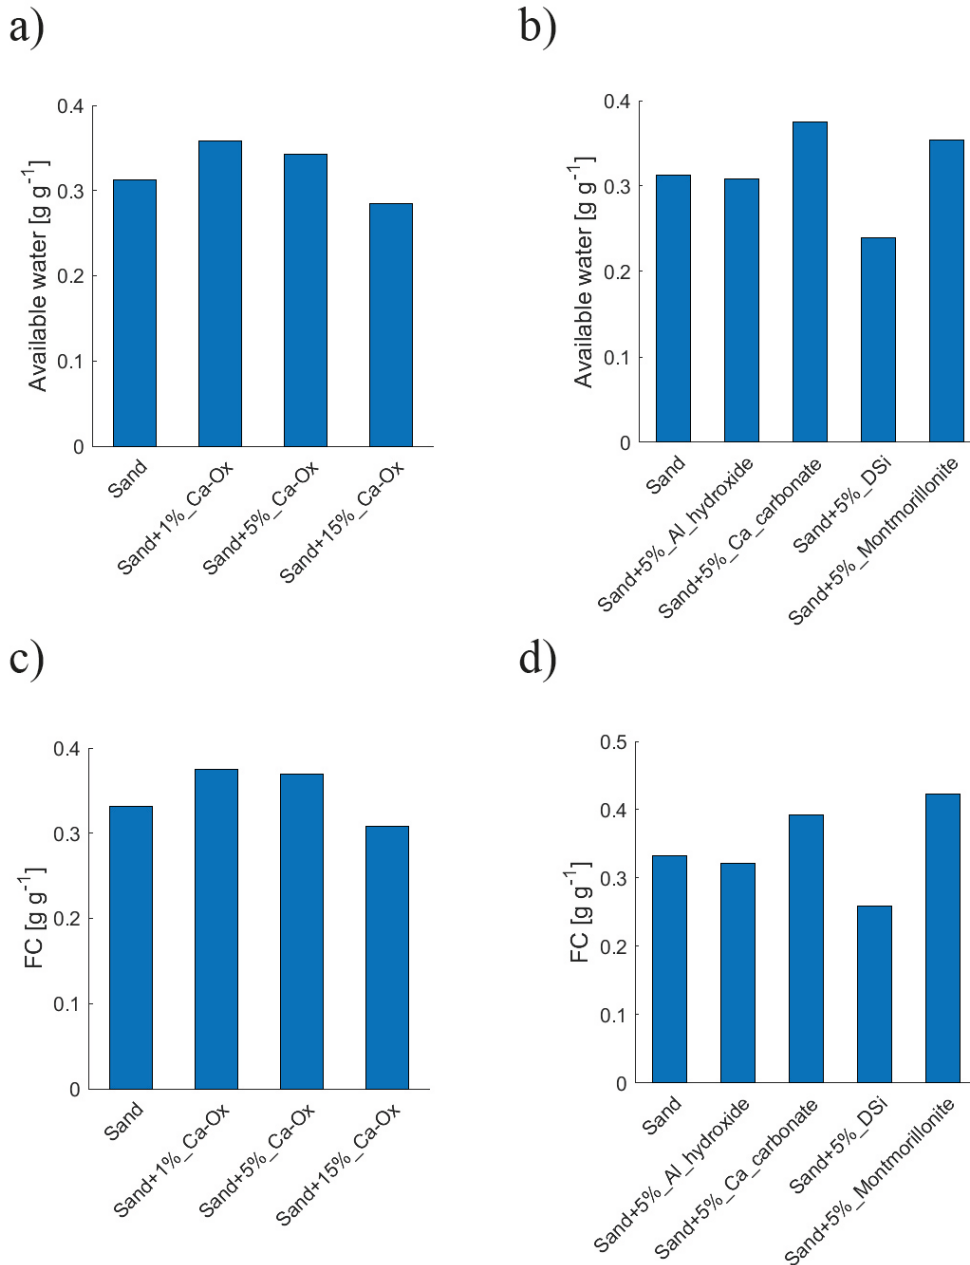

28

29 **Fig. S3. Soil available water and field capacity of sand being affected by calcium oxalate,**  
 30 **aluminum hydroxid, calcium carbonate, dissolved silica (DSi) and**  
 31 **montmorillonite.** Available water of sand mixed with different contents of calcium  
 32 oxalate (Ca-ox) (a) and sand mixed with 5% of aluminum hydroxides (Al\_hydroxide),  
 33 calcium carbonate (Ca\_carbonate), dissolved silica (DSi), or montmorillonite, each (b).  
 34 Field capacity of sand mixed with different contents of calcium oxalate (Ca-ox) (c) and  
 35 sand mixed with 5% of aluminum hydroxides (Al\_hydroxide), calcium carbonate  
 36 (Ca\_carbonate), dissolved silica (DSi), or montmorillonite (d).



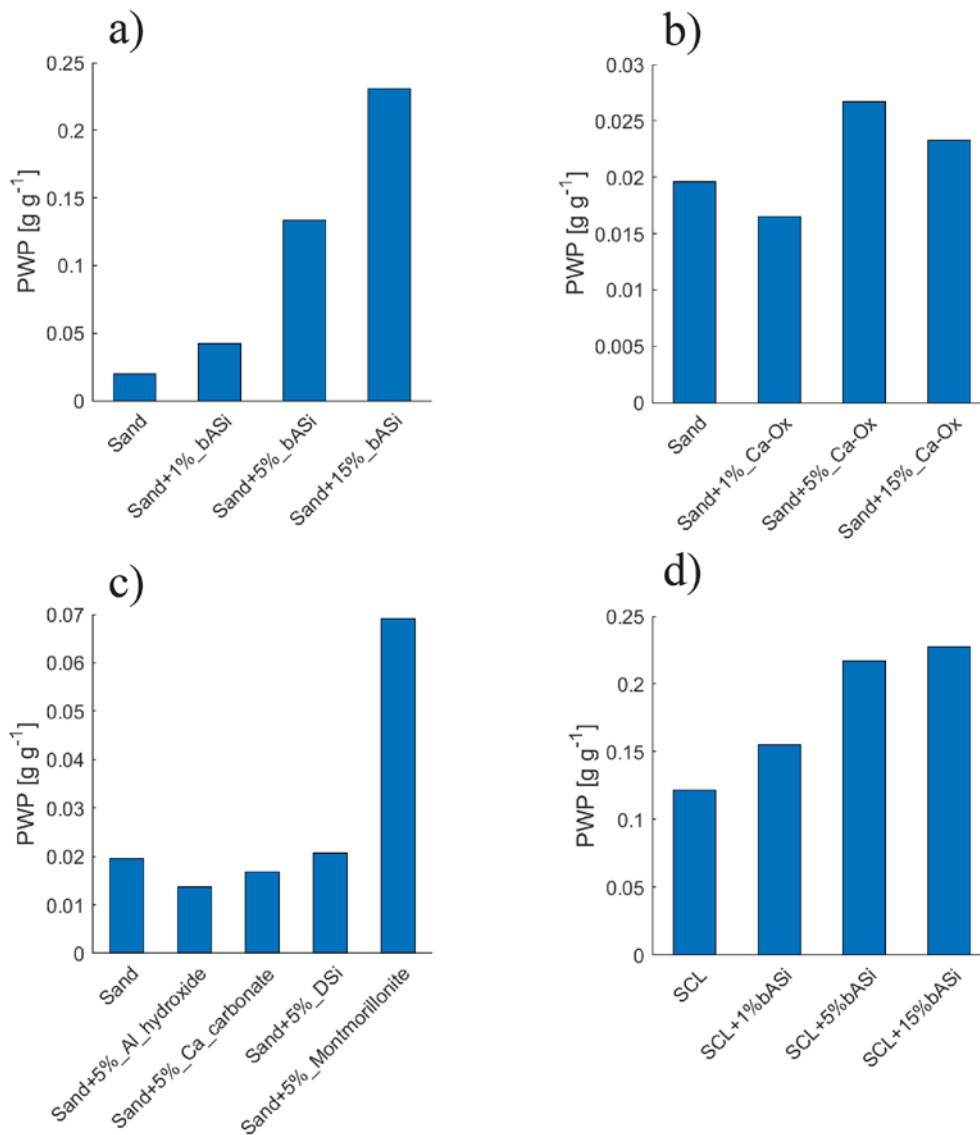

39

40 **Fig. S4. Permanent wilting point of sand and silty clay loam being affected by bASi,**  
 41 **aluminum hydroxid, calcium carbonate, dissolved silica (DSi) and**  
 42 **montmorillonite.** Permanent wilting point of sand mixed with different contents of  
 43 bASi (a), of sand mixed with different contents of calcium oxalate (Ca-ox) (b), of sand  
 44 mixed with 5% of aluminum hydroxides (Al\_hydroxide), calcium carbonate  
 45 (Ca\_carbonate), dissolved silica (DSi), or montmorillonite, each (c), and of a sandy clay  
 46 loam (SCL) mixed with different contents of bASi (d).

47

48

49

50
